# Supplementary material for: Infection agents of Didelphidae (Didelphimorphia) of Brazil: an underestimated matter in zoonoses research
Source: publisher site journal article supplement (doi:10.1515/mammalia-2021-0134), 2021-12-16
Supplement: Supplementary file 2 [file j_mammalia-2021-0134_suppl.docx]

Supplementary material

DOI 10.1515/mammalia-2021-0134

Supplementary data: Survey of didelphid marsupial species with positive results for infectious agents in Brazil.
Number (N) refer to the locations represented in Figures 1, 2 and 3. The institutions are in relation to the first author of the consulted studies. Federative Unities (UF): Alagoas (AL), Amazonas (AM), Bahia (BA), Ceará (CE), Espírito Santo (ES), Distrito Federal (DF), Espirito Santo (ES), Goiás (GO), Maranhão (MA), Minas Gerais (MG), Mato Grosso do Sul (MS), Pará (PA), Paraíba (PB), Pernambuco (PE), Piauí (PI), Paraná (PR), Rio de Janeiro (RJ), Rio Grande do Norte (RN), RO (Rondônia), RS (Rio Grande do Sul), Santa Catarina (SC) and São Paulo (SP).
Methods: Serology (Ser), Culture (Cul), PCR, Microscopy (Mic). Acronyms of institutions as in Figure 4.

| **No.** | **Infectious agent** | **Host** | **Method** | **UF** | **Locality** | **Institution** | **Latitude** | **Longitude** | **References** |
| --- | --- | --- | --- | --- | --- | --- | --- | --- | --- |
| **1** | *Trypanosoma cruzi* | *Caluromys philander* | Ser | GO | Aporé, Serranópolis and Itarumã | Pontifícia Universidade Católica de Goiás | -18.96527 | -51.92638 | De Oliveira 2008 |
| **2** | *Trypanosoma cruzi* | *Marmosa murina* | Ser | GO | Aporé, Serranópolis and Itarumã | Pontifícia Universidade Católica de Goiás | -18.96527 | -51.92638 | De Oliveira 2008 |
| **3** | *Trypanosoma cruzi* | *Didelphis albiventris* | Ser/Cul | GO | Aporé, Serranópolis and Itarumã | Pontifícia Universidade Católica de Goiás | -18.96527 | -51.92638 | De Oliveira 2008 |
| **4** | *Trypanosoma cruzi* | Gracilinanus agilis | Ser | GO | Aporé, Serranópolis and Itarumã | Pontifícia Universidade Católica de Goiás | -18.96527 | -51.92638 | De Oliveira 2008 |
| **5** | *Trypanosoma cruzi* | *Didelphis albiventris* | Mic | GO | Mambaí | Universidade Federal de São Carlos | -14.4861 | -46.104 | Mello 1982 |
| **6** | *Trypanosoma cruzi* | *Didelphis albiventris* | Cul | MS | Jaraguari | Universidade Federal do Mato Grosso do Sul | -3.1072 | -60.028 | Cominetti 2010 |
| **7** | *Leishmania* sp. | *Didelphis albiventris* | Ser/PCR | BA | Camaçari | Universidade Federal da Bahia | -12.6975 | -38.32416 | De Alcântara 2006 |
| **8** | *Toxoplasma gondii* | *Didelphis marsupialis* | Ser | AM | Manaus | Instituto Nacional de Pesquisa da Amazônia | -3.10194 | -60.025 | Ferraroni and Marzochi 1980 |
| **9** | *Toxoplasma gondii* | *Marmosa* sp. | Ser | AM | Manaus | Instituto Nacional de Pesquisa da Amazônia | -3.10194 | -60.025 | Ferraroni and Marzochi 1980 |
| **10** | *Leishmania* sp. | *Didelphis albiventris* | Ser/PCR | BA | Camaçari | Universidade Federal da Bahia | -12.6975 | -38.32416667 | Neto2006 |
| **11** | *Trypanosoma cruzi* | *Didelphis albiventris* | Ser/Cul | CE | Jaguaruana | Instituto Oswaldo Cruz | -4.8338 | -37.781 | Lima MM et al. 2012 |
| **12** | *Trypanosoma cruzi* | *Monodelphis domestica* | Ser | CE | Jaguaruana | Instituto Oswaldo Cruz | -4.8338 | -37.781 | Lima MM et al. 2012 |
| **13** | *Toxoplasma gondii* | *D. albiventris D. aurita* | Ser | PE | Região Metropolitana do Recife | Universidade Federal Rural de Pernambuco | -7.95861 | -34.985 | De Siqueira2010 |
| **14** | *Toxoplasma gondii* | *Marmosa paraguayana* | Ser | PE | Região Metropolitana do Recife | Universidade Federal Rural de Pernambuco | -7.95861 | -34.985 | De Siqueira2010 |
| **15** | *Toxoplasma gondii* | *Marmosops bishopi* | Ser | PE | Região Metropolitana do Recife | Universidade Federal Rural de Pernambuco | -7.95861 | -34.985 | De Siqueira2010 |
| **16** | *Toxoplasma gondii* | *Monodelphis americana* | Ser | PE | Região Metropolitana do Recife | Universidade Federal Rural de Pernambuco | -7.95861 | -34.985 | De Siqueira2010 |
| **17** | *Cryptosporidium* spp. | *Didelphis albiventris* | Mic | PE | Região Metropolitana do Recife | Universidade Federal Rural de Pernambuco | -8.0675 | -34.916 | Da Silva 2016 |
| **18** | *Cryptosporidium* spp. | *Didelphis albiventris* | Mic | PE | Microregião de Araripina | Universidade Federal Rural de Pernambuco | -7.7783 | -39.941 | Da Silva 2016 |
| **19** | *Leishmania infantum* | *Didelphis albiventris* | Ser | PE | Abreu e Lima | Universidade Federal Rural de Pernambuco | -7.9116 | -34.9027 | Monteiro 2010 |
| **20** | *Leishmania amazonensis* | *Didelphis aurita* | Ser | PE | Paudalho | Universidade Federal Rural de Pernambuco | -7.83972 | -35.051 | Monteiro 2010 |
| **21** | *Rickettsia amblyommii* | *Gracilinanus microtarsus* | Ser | RN | Mossoró | Universidade Federal Rural do Semi-Árido | -5.06194 | -37.3983 | Paiva et al.2017 |
| **22** | *Rickettsia amblyommii* | *Monodelphis americana* | Ser | RN | Mossoró | Universidade Federal Rural do Semi-Árido | -5.06194 | -37.3983 | Paiva et al.2017 |
| **23** | *Dirophilaria immitis* | *Philander opossum* | PCR | PA | Belém | Universidade Federal Rural da Amazônia | -1.45583 | -48.504 | Bernal et al. 2015 |
| **24** | *Trypanosoma cruzi* | *Philander opossum* | PCR | PA | Belém | Universidade Federal Rural da Amazônia | -1.45583 | -48.504 | Bernal et al. 2015 |
| **25** | *Rickettsia* spp. | *Didelphis marsupialis* | Ser | RO | Candeias do Jamari | Universidade de São Paulo | -8.78185 | -63.7024 | Terassini 2010 |
| **26** | *Rickettsia* spp. | *Gracilinanus microtarsus* | Ser | RO | Candeias do Jamari | Universidade de São Paulo | -8.78185 | -63.7024 | Terassini 2010 |
| **27** | *Rickettsia* spp. | *Marmosa* sp. | Ser | RO | Candeias do Jamari | Universidade de São Paulo | -8.78185 | -63.7024 | Terassini 2010 |
| **28** | *Trypanosoma cruzi* | *Didelphis albiventris* | - | CE | Jaguaruana | Instituto Oswaldo Cruz | -4.8338 | -37.781 | Maldonado 2014 |
| **29** | *Trypanosoma cruzi* | *Didelphis albiventris* | - | CE | Russas | Instituto Oswaldo Cruz | -4.9393 | -37.9786 | Maldonado 2014 |
| **30** | *Trypanosoma cruzi* | *Didelphis albiventris* | - | GO | Aporé | Instituto Oswaldo Cruz | -18.949 | -51.9088 | Maldonado 2014 |
| **31** | *Trypanosoma cruzi* | *Didelphis aurita* | - | MG | Capitão Andrade | Instituto Oswaldo Cruz | -19.0702 | -41.8635 | Maldonado 2014 |
| **32** | *Trypanosoma cruzi* | *Didelphis marsupialis* | - | PA | Abaetetuba | Instituto Oswaldo Cruz | -1.71806 | -48.8825 | Maldonado 2014 |
| **33** | *Trypanosoma cruzi* | *Didelphis marsupialis* | - | PA | Cachoeira do Ariri | Instituto Oswaldo Cruz | -1.00442 | -48.9574 | Maldonado 2014 |
| **34** | *Trypanosoma cruzi* | *Didelphis marsupialis* | - | PA | Curralinho | Instituto Oswaldo Cruz | -0.536428 | -49.1844 | Maldonado 2014 |
| **35** | *Trypanosoma cruzi* | *Didelphis marsupialis* | - | PA | Itupiranga | Instituto Oswaldo Cruz | -5.17346 | -49.3656 | Maldonado 2014 |
| **36** | *Trypanosoma cruzi* | *Didelphis albiventris* | - | PI | Coronel José Dias | Instituto Oswaldo Cruz | -8.83635 | -42.4967 | Maldonado 2014 |
| **37** | *Trypanosoma cruzi* | *Didelphis albiventris* | - | PI | São Raimundo Nonato | Instituto Oswaldo Cruz | -9.01506 | -42.6973 | Maldonado 2014 |
| **38** | *Trypanosoma cruzi* | *Didelphis aurita* | - | RJ | Silva Jardim | Instituto Oswaldo Cruz | -22.6595 | -42.3824 | Maldonado 2014 |
| **39** | *Trypanosoma cruzi* | *Didelphis aurita* | - | RJ | Guapimirim | Instituto Oswaldo Cruz | 22.53722 | -42.98194 | Maldonado 2014 |
| **40** | *Trypanosoma cruzi* | *Didelphis aurita* | - | SC | Camboriu | Instituto Oswaldo Cruz | -27.0258 | -48.6549 | Maldonado 2014 |
| **41** | *Trypanosoma cruzi* | *Didelphis aurita* | - | SC | Navegantes | Instituto Oswaldo Cruz | -26.8994 | -48.6553 | Maldonado 2014 |
| **42** | *Rickettsia rickettsii Rickettsia parkeri Rickettsia amblyommii* | *Didelphis albiventris* | Ser | MG | Parque Nacional Grande Sertão de Veredas | Universidade de São Paulo | -15.3472 | -45.808 | Barbieri 2016 |
| **43** | *Rickettsia felis* | *Didelphis aurita* | Ser | MG | Santa Cruz do Escalvado, Pingo D' Água and Caratinga | Universidade Federal de Ouro Preto | -20.23527 | -42.81694 | Milagres et al. 2010 |
| **44** | *Borrelia* sp. | *Didelphis aurita* | Mic | RJ | Seropédica | Universidade Federal Rural do Rio de janeiro | -22.7438 | -43.7075 | Abel et al. 2000 |
| **45** | *Trypanosoma cruzi* | *Didelphis aurita* | Ser | RJ | Piraí | Universidade Federal do Rio de Janeiro | -22.62916 | -43.89805 | Liaño 2013 |
| **46** | *Trypanosoma cruzi* | *Marmosops paulensis* | Ser | RJ | Piraí | Universidade Federal do Rio de Janeiro | -22.62916 | -43.89805 | Liaño 2013 |
| **47** | *Trypanosoma cruzi* | *Metachirus myosuros* | Ser | RJ | Piraí | Universidade Federal do Rio de Janeiro | -22.62916 | -43.89805 | Liaño 2013 |
| **48** | *Trypanosoma cruzi* | *Philander frenatus* | Ser | RJ | Piraí | Universidade Federal do Rio de Janeiro | -22.62916 | -43.89805 | Liaño 2013 |
| **49** | *Lyssavirus* | *Didelphis albiventris* | Ser | SP | Torre de Pedra | Universidade Estadual Paulista | -23.2494 | -48.19416 | Bacchiega 2014 |
| **50** | *Lyssavirus* | *D. aurita D. albiventris* | Ser | SP | Bofete | Universidade Estadual Paulista | -23.0983 | -48.1905 | Bacchiega 2014 |
| **51** | *Lyssavirus* | *Didelphis albiventris* | Ser | SP | Anhembi | Universidade Estadual Paulista | -22.78583 | -48.125 | Bacchiega 2014 |
| **52** | *Lyssavirus* | *Didelphis aurita* | Ser | SP | Bertioga | Universidade de São Paulo | -23.854 | -46.13861 | Araujo et al. 2014 |
| **53** | *Leishmania infantum Leishmania braziliensis* | *Didelphis aurita* | Ser/PCR | MG | Belo Horizonte | Royal Tropical Institute | -19.92083 | -43.937 | Schallig et al. 2007 |
| **54** | *Toxoplasma gondii* | *Gracilinanus microtarsus* | Ser | SP | Angatuba | Universidade de São Paulo | -23.4883 | -48.4138 | De Oliveira 2011 |
| **55** | *Salmonella enterica* | *D. albiventris D.aurita* | Cul | SP | São Paulo, Sorocaba, Santos, São Bernado | Universidade de São Paulo | -23.5475 | -46.6361 | Casagrande et al. 2011 |
| **56** | *Trypanosoma (Megatrypanum) saloboense* | *Monodelphis emiliae* | Cul | PA | Serra de Carajás | Instituto Evandro Chagas | -5.7963 | -50.5152 | Lainson et al. 2008 |
| **57** | *Leishmania* sp. | *Didelphis albiventris* | PCR | SP | Teodoro Sampaio | Universidade Estadual Paulista | -22.5325 | -52.1675 | Quintal2010 |
| **58** | *Leishmania* sp. | *Marmosa paraguayana* | PCR | SP | Teodoro Sampaio | Universidade Estadual Paulista | -22.5325 | -52.1675 | Quintal2010 |
| **59** | *Leishmania* sp. | *Didelphis albiventris* | PCR | SP | Botucatu | Universidade Estadual Paulista | -22.88583 | -48.445 | Richini-Pereira et al. 2014 |
| **60** | *Viannaia hamata* | *Didelphis aurita* | Mic | RJ | Macaé | Instituto Oswaldo Cruz | -22.37083 | -41.78694 | Gomes et al. 2003 |
| **61** | *Viannaia viannai* | *Philander frenatus* | Mic | RJ | Surui | Instituto Oswaldo Cruz | -22.6527 | -43.0405 | Gomes et al. 2003 |
| **62** | *Aspidodera raillieti* | *Philander frenatus* | Mic | RJ | Macaé | Instituto Oswaldo Cruz | -22.37083 | -41.78694 | Gomes et al. 2003 |
| **63** | *Aspidodera raillieti* | *Didelphis aurita* | Mic | RJ | Macaé | Instituto Oswaldo Cruz | -22.37083 | -41.78694 | Gomes et al. 2003 |
| **64** | *Cruzia tentaculata* | *Didelphis aurita* | Mic | RJ | Macaé | Instituto Oswaldo Cruz | -22.37083 | -41.78694 | Gomes et al. 2003 |
| **65** | *Gongylonemoides marsupialis* | *Didelphis aurita* | Mic | RJ | Casimiro de Abreu | Instituto Oswaldo Cruz | -22.4805 | -42.20416 | Gomes et al. 2003 |
| **66** | *Turgida turgida* | *Didelphis aurita* | Mic | RJ | Casimiro de Abreu | Instituto Oswaldo Cruz | -22.4805 | -42.20416 | Gomes et al. 2003 |
| **67** | *Spirura guianensis* | *Philander frenatus* | Mic | RJ | Macaé | Instituto Oswaldo Cruz | -22.37083 | -41.78694 | Gomes et al. 2003 |
| **68** | *Sarcocystis* spp. | *Didelphis aurita* | PCR | SP | Sorocaba | Universidade de São Paulo | -23.5062 | -47.4559 | Cesar 2011 |
| **69** | *Sarcocystis* spp. | *Didelphis albiventris* | PCR | SP | São Paulo, Sorocaba, Santos, São Bernado | Universidade de São Paulo | -23.5475 | -46.63611 | Cesar 2011 |
| **70** | *Leptospira* spp. | *Didelphis aurita* | Ser/Cul | RS | Pelotas | Universidade Federal de Pelotas | -31.77194 | -52.3425 | Jorge 2009 |
| **71** | *Brucella* sp. | *Didelphis albiventris* | Ser | SP | Botucatu | Universidade Estadual Paulista | -22.88583 | -48.445 | Antunes et al. 2010 |
| **72** | *Strongyloides* sp. | *Lutreolina crassicaudata* | Mic | SP | Botucatu | Centro Universitário de Rio Preto | -22.88583 | -48.445 | Cardia et al. 2016 |
| **73** | *Leishmania* sp. | *Didelphis albiventris* | PCR | DF | Brasília | Universidade de Brasília | -15.7794 | -47.9294 | Nascimento 2017 |
| **74** | *Leishmania* sp. | *Gracilinanus agilis* | PCR | DF | Brasília | Universidade de Brasília | -15.7794 | -47.9294 | Nascimento 2017 |
| **75** | *Cruzia tentaculata* | *Didelphis aurita* | Mic | RJ | Rio de Janeiro | Instituto Oswaldo Cruz | -22.9035 | -43.2096 | Castro et al.2017 |
| **76** | *Turgida turgida* | *Didelphis aurita* | Mic | RJ | Rio de Janeiro | Instituto Oswaldo Cruz | -22.9035 | -43.2096 | Castro et al.2017 |
| **77** | *Aspidodera raillieti* | *Didelphis aurita* | Mic | RJ | Rio de Janeiro | Instituto Oswaldo Cruz | -22.9035 | -43.2096 | Castro et al.2017 |
| **78** | *Ancylostoma* sp. | *Didelphis albiventris* | Mic | AL | Viçosa | Universidade Federal de Pernambuco | -9.36338 | -36.2386 | Silva et al. 2017 |
| **79** | *Trichuris* sp. | *Didelphis albiventris* | Mic | AL | Viçosa | Universidade Federal de Pernambuco | -9.36338 | -36.2386 | Silva et al. 2017 |
| **80** | *Toxoscara* sp. | *Didelphis albiventris* | Mic | AL | Viçosa | Universidade Federal de Pernambuco | -9.36338 | -36.2386 | Silva et al. 2017 |
| **81** | *Trypanosoma cruzi* | *Didelphis albiventris* | Cul/PCR | MA | Açailândia | Universidade de São Paulo | -4.95394 | -47.5019 | da Costa et al. 2015 |
| **82** | *Trypanosoma cruzi* | *Didelphis marsupialis* | Cul/PCR | MA | São Domingos | Universidade de São Paulo | -5.57583 | -44.38527 | da Costa et al. 2015 |
| **83** | *Trypanosoma cruzi* | *Gracilinanus agilis* | Cul/PCR | MA | Açailândia | Universidade de São Paulo | -4.95394 | -47.5019 | da Costa et al. 2015 |
| **84** | *Trypanosoma cruzi* | *Philander opossum* | Cul/PCR | MA | Açailândia | Universidade de São Paulo | -4.95394 | -47.5019 | da Costa et al. 2015 |
| **85** | *Rickettsia* spp. | *Didelphis aurita* | Ser | SP | Peruibe | Universidade de São Paulo | -24.32 | -46.99805 | Szabó et al. 2013 |
| **86** | *Rickettsia* spp. | *Monodelphis sp.* | Ser | SP | Peruibe | Universidade de São Paulo | -24.32 | -46.99805 | Szabó et al. 2013 |
| **87** | *Leishmania* sp. | *Didelphis albiventris* | PCR | DF | Brasília | Universidade de Brasília | -15.7794 | -47.9294 | Cardoso et al. 2015 |
| **88** | *Leishmania* sp. | *Gracilinanus agilis* | PCR | DF | Brasília | Universidade de Brasília | -15.7794 | -47.9294 | Cardoso et al. 2015 |
| **89** | *Leishmania infantum* | *Didelphis aurita* | Ser/PCR | RJ | Rio de Janeiro | Instituto Oswaldo Cruz | -22.9035 | -43.2096 | Carreira et al. 2012 |
| **90** | *Toxoplasma gondii* | *Didelphis albiventris* | Ser/PCR | RN | Natal | Universidade de São Paulo | -5.79448 | -35.211 | Fournier 2012 |
| **91** | *Toxoplasma gondii* | *Monodelphis americana* | Ser/PCR | RN | Natal | Universidade de São Paulo | -5.79448 | -35.211 | Fournier 2012 |
| **92** | *Trypanosma cascavelli Trypanosoma dionisii Trypanosoma* sp. | *Monodelphis americana* | Cul/PCR | ES | Guarapari | Instituto Oswaldo Cruz | -20.6 | -40.4975 | Dario et al. 2017 |
| **93** | *Trypanosoma cruzi* | *Didelphis aurita* | Ser | ES | Guarapari | Instituto Oswaldo Cruz | -20.6 | -40.4975 | Dario et al. 2017 |
| **94** | *Trypanosoma cruzi* | *Metachirus myosuros* | Ser | ES | Guarapari | Instituto Oswaldo Cruz | -20.6 | -40.4975 | Dario et al. 2017 |
| **95** | *Trypanosoma genari* | *Monodelphis domestica* | Cul | MG | Morada Nova de Minas | Universidade de São Paulo | -18.604 | -45.356 | Ferreira 2015 |
| **96** | *Leptospira borgpetersenii* | *Didelphis albiventris* | Ser/Cul | SP | Jabuticabal | Universidade Estadual Paulista | -21.25472 | -48.32 | Silva et al. 2013 |
| **97** | *Trypanosoma cruzi* | *Didelphis aurita* | Ser/Cul | RJ | Sumidouro | Instituto Oswaldo Cruz | -22.04972 | -42.67472 | Portugal 2009 |
| **98** | *Trypanosoma cruzi* | *Philander frenatus* | Ser/Cul | SP | Sumidouro | Instituto Oswaldo Cruz | -22.04972 | -42.67472 | Portugal 2009 |
| **99** | *Trypanosoma cruzi* | *Didelphis aurita* | Mic | RJ | Rio de Janeiro | Instituto Oswaldo Cruz | -22.9027 | -43.2075 | Gumarães and Jansen 1943 |
| **100** | *Trypanosoma cruzi* | *Metachirus myosuros* | Cul | RJ | Rio de Janeiro | Instituto Oswaldo Cruz | -22.9027 | -43.2075 | Gumarães and Jansen 1943 |
| **101** | *Trypanosoma cruzi* | *Didelphis marsupialis* | Cul | PA | Ananindeua | Instituto Oswaldo Cruz | -1.365 | -48.372 | Rodrigues and Melo 1942 |
| **102** | *Trypanosoma cruzi* | *Didelphis aurita* | Ser/Cul | SC | Navegantes | Instituto Oswaldo Cruz | -26.89889 | -48.65417 | Roque et al. 2008 |
| **103** | *Trypanosoma cruzi* | *Didelphis albiventris* | Ser/Cul | SC | Navegantes | Instituto Oswaldo Cruz | -26.89890 | -47.65417 | Roque et al. 2008 |
| **104** | *Trypanosoma cruzi* | *Didelphis albiventris* | Ser/Cul | CE | Redenção | Instituto Oswaldo Cruz | -4.22637 | -38.7314 | Roque et al. 2008 |
| **105** | *Trypanosoma cruzi* | *Monodelphis domestica* | Ser/Cul | CE | Redenção | Instituto Oswaldo Cruz | -4.22637 | -38.7314 | Roque et al. 2008 |
| **106** | *Trypanosoma cruzi* | *Didelphis marsupialis* | Ser/Cul | PA | Cachoeira do Ariri | Instituto Oswaldo Cruz | -1.00442 | -48.9574 | Roque et al. 2008 |
| **107** | *Trypanosoma cruzi* | *Marmosops parvidens* | Ser/Cul | PA | Cachoeira do Ariri | Instituto Oswaldo Cruz | -1.00442 | -48.9574 | Roque et al. 2008 |
| **108** | *Trypanosoma cruzi* | *Didelphis albiventris* | Cul | CE | Russas | Universidade Federal do Ceará | -4.94027 | -37.97583 | Alencar et al. 1977 |
| **109** | *Trypanosoma cruzi* | *Didelphis aurita* | Cul | RJ | Teresópolis | Instituto Oswaldo Cruz | -22.412 | -42.965 | Pinho et al. 2000 |
| **110** | *Trypanosoma cruzi* | *Philander frenatus* | Cul | RJ | Teresópolis | Instituto Oswaldo Cruz | -22.412 | -42.965 | Pinho et al. 2000 |
| **111** | *Toxoplasma gondii* | *Didelphis aurita* | Ser | SP | São Paulo | Universidade de São Paulo | -23.548 | -46.638 | Yai et al. 2003 |
| **112** | *Neospora caninum* | *Didelphis aurita* | Ser | SP | São Paulo | Universidade de São Paulo | -23.548 | -46.638 | Yai et al. 2003 |
| **113** | *Leishmania infantum* | *Didelphis albiventris* | - | BA | Jacobina | Instituto Gonçalo Moniz | -11.1805 | -40.5183 | Sherlock 1996 |
| **114** | *Leishmania mexicana Leishmania braziliensis* | *Didelphis marsupialis* | Cul | AM | Manaus | Instituto Nacional de Pesquisa da Amazônia | -3.10194 | -60.025 | Arias et al. 1981 |
| **115** | *Leishmania mexicana* | *Marmosa* sp. | Cul | AM | Manaus | Instituto Nacional de Pesquisa da Amazônia | -3.10194 | -60.025 | Arias et al. 1981 |
| **116** | *Leishmania braziliensis* | *Marmosa* sp. | PCR | PE | Amajari | Instituto Aggeu Magalhães | -8.38305 | -35.4525 | Brandão-Filho et al. 2003 |
| **117** | *Leishmania sp.* | *Marmosa murina* | Cul | PA | Belém | Instituto Evandro Chagas | -1.45583 | -48.504 | Lainson and Shaw 1969 |
| **118** | *Leishmania donovani* | *Didelphis albiventris* | Ser | BA | Jacobina | Instituto Gonçalo Moniz | -11.1805 | -40.5183 | Sherlock et al. 1984 |
| **119** | *Leishmania mexicana* | *Didelphis aurita* | Ser | SP | Conchas | Universidade Estadual Paulista | -23.01527 | -48.0105 | Yoshida et al. 1985 |
| **120** | *Flavivirus* | *Didelphis albiventris* | Ser | MG | Sabará | Universidade Federal de Minas gerais | -19.88583 | -43.8125 | Ázara 2013 |
| **121** | *Borrelia burgdorferi* | *Didelphis aurita* | Ser | MG | Santa Cruz do Escalvado | Universidade Federal de Viçosa | -20.2353 | -42.8169 | Montandon et al. 2014 |
| **122** | *Leishmania braziliensis* | *Didelphis albiventris* | PCR | MG | São João das Missões | Instituto Oswaldo Cruz | -14.883611 | -44.090556 | Quaresma et al. 2011 |
| **123** | *Leishmania braziliensis* | *Gracilinanus agilis* | PCR | MG | São João das Missões | Instituto Oswaldo Cruz | -14.883611 | -44.090556 | Quaresma et al. 2011 |
| **124** | *Leishmania guyanensis* | *Marmosops incanus* | PCR | MG | São João das Missões | Instituto Oswaldo Cruz | -14.883611 | -44.090556 | Quaresma et al. 2011 |
| **125** | *Yersinia pestis* | *Monodelphis domestica* | Cul | PE | Chapada do Araripe | Instituto Aggeu Magalhães | -7.20158 | -40.0319 | Almeida et al. 1987 |
| **126** | *Gracilioxyuris agilis* | *Marmosa paraguayana* | Mic | SP | Mogi-Guaçu | Universidade Estadual de Campinas | -22.250000 | -47.133333 | Santos-Rondon et al. 2002 |
| **127** | *Pterygodermatites (Paucipectines) jagerskioldi* | *Gracilinanus microtarsus* | Mic | RJ | Teresópolis | Instituto Oswaldo Cruz | -22.4123 | -42.9664 | Torres et al. 2007 |
| **128** | *Pterygodermatites (Paucipectines) jagerskioldi* | *Gracilinanus agilis* | Mic | MS | Nhecolândia | Instituto Oswaldo Cruz | -19.581667 | -56.25 | Torres et al. 2007 |
| **129** | *Viannaia hamata* | *Didelphis albiventris* | Mic | RS | Pelotas | Universidade Federal do Rio Grande do Sul | -31.776 | -52.3594 | Antunes 2005 |
| **130** | *Travassostrongylus orloffi* | *Didelphis albiventris* | Mic | RS | Pelotas | Universidade Federal do Rio Grande do Sul | -31.776 | -52.3594 | Antunes 2005 |
| **131** | *Didelphostrongylus hayesi* | *Didelphis albiventris* | Mic | RS | Pelotas | Universidade Federal do Rio Grande do Sul | -31.776 | -52.3594 | Antunes 2005 |
| **132** | *Trichuris didelphis e Trichuris minuta* | *Didelphis albiventris* | Mic | RS | Pelotas | Universidade Federal do Rio Grande do Sul | -31.776 | -52.3594 | Antunes 2005 |
| **133** | *Capillaria* sp. | *Didelphis albiventris* | Mic | RS | Pelotas | Universidade Federal do Rio Grande do Sul | -31.776 | -52.3594 | Antunes 2005 |
| **134** | *Aspidodera raillieti* | *Didelphis albiventris* | Mic | RS | Pelotas | Universidade Federal do Rio Grande do Sul | -31.776 | -52.3594 | Antunes 2005 |
| **135** | *Cruzia tentaculata* | *Didelphis albiventris* | Mic | RS | Pelotas | Universidade Federal do Rio Grande do Sul | -31.776 | -52.3594 | Antunes 2005 |
| **136** | *Turgida turgida* | *Didelphis albiventris* | Mic | RS | Pelotas | Universidade Federal do Rio Grande do Sul | -31.776 | -52.3594 | Antunes 2005 |
| **137** | *Gnathostoma* sp. | *Didelphis albiventris* | Mic | RS | Pelotas | Universidade Federal do Rio Grande do Sul | -31.776 | -52.3594 | Antunes 2005 |
| **138** | *Rhopalias coronatus Rhopalias baculifer* | *Didelphis albiventris* | Mic | RS | Pelotas | Universidade Federal do Rio Grande do Sul | -31.776 | -52.3594 | Antunes 2005 |
| **139** | *Brachylaema migrans* | *Didelphis albiventris* | Mic | RS | Pelotas | Universidade Federal do Rio Grande do Sul | -31.776 | -52.3594 | Antunes 2005 |
| **140** | *Plagiorchis didelphidis* | *Didelphis albiventris* | Mic | RS | Pelotas | Universidade Federal do Rio Grande do Sul | -31.776 | -52.3594 | Antunes 2005 |
| **141** | *Didelphodiplostomum variabile* | *Didelphis albiventris* | Mic | RS | Pelotas | Universidade Federal do Rio Grande do Sul | -31.776 | -52.3594 | Antunes 2005 |
| **142** | *Echinostoma revolutum* | *Didelphis albiventris* | Mic | RS | Pelotas | Universidade Federal do Rio Grande do Sul | -31.776 | -52.3594 | Antunes 2005 |
| **143** | *Hamanniella microcephala* | *Didelphis albiventris* | Mic | RS | Pelotas | Universidade Federal do Rio Grande do Sul | -31.776 | -52.3594 | Antunes 2005 |
| **144** | *Centrorhynchus* sp. | *Didelphis albiventris* | Mic | RS | Pelotas | Universidade Federal do Rio Grande do Sul | -31.776 | -52.3594 | Antunes 2005 |
| **145** | *Cruzia* sp. | *Philander opossum* | Mic | PA | Carajás | Universidade Federal do Pará | -5.583333 | -50.4 | Araujo 2011 |
| **146** | *Aspidodera* sp. | *Philander opossum* | Mic | PA | Carajás | Universidade Federal do Pará | -5.583333 | -50.4 | Araujo 2011 |
| **147** | *Eimeria* sp. | *Gracilinanus agilis* | Mic | MG | Uberlândia | Universidade Federal de Uberlândia | -19.15555 | -48.3888 | Strona 2016 |
| **148** | *Trypanosoma cruzi* | *Didelphis albiventris* | Ser/Cul/Mic | MG | Bambuí | Instituto René Rachou | -20.0214 | -45.9608 | Fernandes et al. 1989 |
| **149** | *Gracilioxyuris* sp. | *Gracilinanus agilis* | Mic | MS | Aquidauana | Universidade Federal do Rio de Janeiro | -20.4749 | -55.7863 | Feijó et al. 2008 |
| **150** | *Bartonella* spp. | *Didelphis aurita Didelphis albiventris* | PCR | RJ | Vassouras | Universidade Federal Fluminense | -22.403889 | -43.6625 | Alcântara et al. 2020 |
| **151** | *Trypanosoma* sp. | *Lutreolina crassicaudata* | Cul/Mic | SP | Ribeirão Preto | Universidade de São Paulo | -21.1767 | -​47.8208 | Barreto and Siqueira 1962 |
| **152** | *Trypanosoma* sp. | *Gracilinanus agilis* | Cul | SP | Morro Agudo | Universidade de São Paulo | -20.7276 | -48.0539 | Corrêa and Barreto 1964 |
| **153** | *Trypanosoma cruzi* | *Didelphis marsupialis* | PCR | PA | Castanhal | Universidade Federal do Pará | -1.29733 | -47.9221 | Pereira et al. 2021 |
| **154** | *Leptospira* spp. | *Didelphis marsupialis* | PCR | PA | Santa Barbára | Universidade Federal do Pará | -1.285211 | -48.262233 | Rocha et al. 2020 |
| **155** | *Leptospira* spp. | *Marmosops woodalli* | PCR | PA | Santa Barbára | Universidade Federal do Pará | -1.285211 | -48.262233 | Rocha et al. 2020 |
| **156** | *Leptospira* spp. | *Didelphis marsupialis* | Ser | PA | Peixe-Boi | Universidade Federal do Pará | -1.20476 | -47.3152 | Mesquita et al. 2018 |
| **157** | *Leptospira* spp. | *Caluromys philander* | Ser | PA | Peixe-Boi | Universidade Federal do Pará | -1.20476 | -47.3152 | Mesquita et al. 2018 |
| **158** | *Leptospira* spp. | *Marmosa murina* | Ser | PA | Viseu | Universidade Federal do Pará | -1.196667 | -46.14 | Mesquita et al. 2018 |
| **159** | *Orthopoxvirus* | *Didelphis albiventris* | PCR | SP | Itatinga | Universidade Estadual Paulista | -23.101944 | -48.615833 | Peres at al. 2016 |
| **160** | *Orthopoxvirus* | *Didelphis albiventris* | PCR | SP | Anhembi | Universidade Estadual Paulista | -22.7887 | -48.1275 | Peres et al. 2018 |
| **161** | *Orthopoxvirus* | *Didelphis aurita* | PCR | SP | Bofete | Universidade Estadual Paulista | -23.098475 | -48.194303 | Peres et al. 2018 |
| **162** | *Alphavirus* | *Didelphis marsupialis* | Ser | PA | Belém | Universidade Federal Rural da Amazônia | -1.45583 | -48.504 | Bernal et al. 2021 |
| **163** | *Flavivirus* | *Didelphis marsupialis* | Ser | PA | Belém | Universidade Federal Rural da Amazônia | -1.45583 | -48.504 | Bernal et al. 2021 |
| **164** | *Orthobunyavírus* | *Didelphis marsupialis* | Ser | PA | Belém | Universidade Federal Rural da Amazônia | -1.45583 | -48.504 | Bernal et al. 2021 |
| **165** | *Flavivirus* | *Philander opossum* | Ser | PA | Belém | Universidade Federal Rural da Amazônia | -1.45583 | -48.504 | Bernal et al. 2021 |
| **166** | *Bunyavirus* | *Philander opossum* | Ser | PA | Belém | Universidade Federal Rural da Amazônia | -1.45583 | -48.504 | Bernal et al. 2021 |
| **167** | *Parvovirus* | *Didelphis albiventris* | PCR | SP | Teodoro Sampaio | Universidade Estadual Paulista | -22.5325 | -52.1675 | De Souza et al. 2018a |
| **168** | *Sigmatorquevirus Alphatorquevirus* | *Didelphis albiventris* | PCR | SP | Teodoro Sampaio | Universidade Estadual Paulista | -22.5325 | -52.1675 | De Souza et al. 2018b |
| **169** | *Lyssavirus* | *Didelphis aurita* | Ser | SP | São Paulo | Universidade de São Paulo | -23.5489 | -46.6388 | Almeida et al. 2001 |
| **170** | *Lyssavirus* | *Didelphis albiventris* | Ser | SP | São Paulo | Universidade de São Paulo | -23.5489 | -46.6388 | Almeida et al. 2001 |
| **171** | *Lyssavirus* | *Lutreolina crassicaudata* | Ser | SP | São Paulo | Universidade de São Paulo | -23.5489 | -46.6388 | Almeida et al. 2001 |
| **172** | *Sarcocystis neurona* | *Didelphis albiventris* | Cul | SP | São Paulo | United States Department of Agriculture | -23.5489 | -46.6388 | Dubey et al. 2001a |
| **173** | *Sarcocystis falcatula* | *Didelphis aurita Didelphis albiventris* | Cul | SP | São Paulo | United States Department of Agriculture | -23.5489 | -46.6388 | Dubey et al. 2001b |
| **174** | *Sarcocystis falcatula Sarcocystis lindsayi* | *Didelphis aurita* | Cul/PCR | RJ | Campos dos Goytacazes | Universidade Estadual do Norte Fluminense | -21.7545 | -41.3244 | Gallo et al. 2018 |
| **175** | *Sarcocystis* spp. | *Didelphis aurita Didelphis albiventris* | PCR | BA | Salvador | Universidade Federal da Bahia | -12.9704 | -38.5124 | Gondim et al. 2017 |
| **176** | *Neospora caninum* | *Didelphis aurita Didelphis albiventris* | PCR | BA | Salvador | Universidade Federal da Bahia | -12.9704 | -38.5124 | Gondim et al. 2017 |
| **177** | *Sarcocystis falcatula* | *Didelphis aurita* | Cul/PCR | BA | Salvador | Universidade Federal da Bahia | -12.9704 | -38.5124 | Gondim at al. 2019 |
| **178** | *Morbillivirus* | *Didelphis* sp. | Ser/Cul/PCR | PR | Uraí | Universidade Estadual de Londrina | -23.2 | -50.7939 | Laforente et al. 2021 |
| **179** | *Morbillivirus* | *Didelphis* sp. | Ser/Cul/PCR | PR | Cambe, Ibiborã, Londrina | Universidade Estadual de Londrina | -23.2927 | -51.1732 | Laforente et al. 2021 |
| **180** | *Orthopoxvirus* | *Didelphis* sp. | Ser/PCR | MG | Rio Pomba | Universidade Federal de Minas gerais | -21.26828 | -43.176636 | Miranda et al. 2017 |
| **181** | *Orthopoxvirus* | *Caluromys philander* | PCR | MG | Rio Pomba | Universidade Federal de Minas gerais | -21.26828 | -43.176636 | Miranda et al. 2017 |
| **182** | *Trypanosoma cruzi* | *Didelphis albiventris* | PCR | MS | Campo Grande | Universidade Católica Dom Bosco | -20.4435 | -54.6478 | Nantes et al. 2019 |
| **183** | *Trypanosoma rangeli* | *Metachirus myosuros* | Cul | RO | BR 364, Km 54 | Instituto Evandro Chagas | -10.297253 | -62.68904 | Miles et al. 1983 |
| **184** | *Trypanosoma rangeli* | *Didelphis marsupialis* | Cul | RO | BR 364, Km 54 | Instituto Evandro Chagas | -10.297253 | -62.68904 | Miles et al. 1983 |
| **185** | *Trypanosoma rangeli* | *Didelphis marsupialis* | Cul | AM | Manaus | Instituto Evandro Chagas | -3.10719 | -60.0261 | Miles et al. 1983 |
| **186** | *Yersinia pestis* | *Monodelphis domestica* | Ser/Cul | PB | Planalto da Borborema | Instituto Aggeu Magalhães | -6.76604 | -35.7174 | Almeida et al. 1989 |
| **187** | *Yersinia pestis* | *Didelphis albiventris* | Ser/Cul | PB | Planalto da Borborema | Instituto Aggeu Magalhães | -6.76604 | -35.7174 | Almeida et al. 1989 |
| **188** | *Toxoplasma gondii* | *Didelphis aurita* | Ser | SP | Biritiba-Mirim | Universidade Federal do Vale do São Francisco | -23.5739 | -46.0386 | Horta et al. 2016 |
| **189** | *Toxoplasma gondii* | *Didelphis aurita* | Ser | SP | Guarujá | Universidade Federal do Vale do São Francisco | -23.9946 | -46.2569 | Horta et al. 2016 |
| **190** | *Toxoplasma gondii* | *Didelphis aurita* | Ser | SP | Mogi das Cruzes | Universidade Federal do Vale do São Francisco | -23.5248 | -​46.1871 | Horta et al. 2016 |
| **191** | *Toxoplasma gondii* | *Didelphis aurita* | Ser | SP | Pedreira | Universidade Federal do Vale do São Francisco | -22.7419 | -46.9017 | Horta et al. 2016 |
| **192** | *Toxoplasma gondii* | *Didelphis aurita* | Ser | SP | Ribeirão Pires | Universidade Federal do Vale do São Francisco | -23.7141 | -​46.4137 | Horta et al. 2016 |
| **193** | *Toxoplasma gondii* | *Didelphis aurita* | Ser | SP | São Bernardo do Campo | Universidade Federal do Vale do São Francisco | -23.6944 | -46.5654 | Horta et al. 2016 |
| **194** | *Toxoplasma gondii* | *Didelphis aurita* | Ser | SP | São Paulo | Universidade Federal do Vale do São Francisco | -23.5489 | -46.6388 | Horta et al. 2016 |
| **195** | *Toxoplasma gondii* | *Didelphis aurita* | Ser | SP | Sorocaba | Universidade Federal do Vale do São Francisco | -23.5062 | -47.4559 | Horta et al. 2016 |
| **196** | *Neospora caninum* | *Didelphis aurita* | Ser | SP | São Paulo | Universidade Federal do Vale do São Francisco | -23.5489 | -46.6388 | Horta et al. 2016 |
| **197** | *Leptospira* spp. | *Didelphis aurita* | Ser | SP | Biritiba-Mirim | Universidade Federal do Vale do São Francisco | -23.5739 | -46.0386 | Horta et al. 2016 |
| **198** | *Leptospira* spp. | *Didelphis aurita* | Ser | SP | Guarujá | Universidade Federal do Vale do São Francisco | -23.9946 | -46.2569 | Horta et al. 2016 |
| **199** | *Leptospira* spp. | *Didelphis aurita* | Ser | SP | Mogi das Cruzes | Universidade Federal do Vale do São Francisco | -23.5248 | -​46.1871 | Horta et al. 2016 |
| **200** | *Leptospira* spp. | *Didelphis aurita* | Ser | SP | Pedreira | Universidade Federal do Vale do São Francisco | -22.7419 | -46.9017 | Horta et al. 2016 |
| **201** | *Leptospira* spp. | *Didelphis aurita* | Ser | SP | Ribeirão Pires | Universidade Federal do Vale do São Francisco | -23.7141 | -​46.4137 | Horta et al. 2016 |
| **202** | *Leptospira* spp. | *Didelphis aurita* | Ser | SP | São Paulo | Universidade Federal do Vale do São Francisco | -23.5489 | -46.6388 | Horta et al. 2016 |
| **203** | *Leptospira* spp. | *Didelphis aurita* | Ser | SP | Sorocaba | Universidade Federal do Vale do São Francisco | -23.5062 | -47.4559 | Horta et al. 2016 |
| **204** | *Toxoplasma gondii* | *Didelphis albiventris* | Ser | SP | Piracicaba | Universidade Federal do Vale do São Francisco | -22.725 | -47.6476 | Horta et al. 2016 |
| **205** | *Toxoplasma gondii* | *Didelphis albiventris* | Ser | SP | São Bernardo do Campo | Universidade Federal do Vale do São Francisco | -23.6944 | -46.5654 | Horta et al. 2016 |
| **206** | *Toxoplasma gondii* | *Didelphis albiventris* | Ser | SP | Sorocaba | Universidade Federal do Vale do São Francisco | -23.5062 | -47.4559 | Horta et al. 2016 |
| **207** | *Leptospira* spp. | *Didelphis albiventris* | Ser | SP | Sorocaba | Universidade Federal do Vale do São Francisco | -23.5062 | -47.4559 | Horta et al. 2016 |
| **208** | *Mycoplasma* sp. | *Didelphis albiventris* | PCR | PR | Maringá | Universidade Estadual de Londrina | -23.4273 | -51.9375 | Massini et al. 2019 |
| **209** | *Mycoplasma haemoalbiventris* | *Didelphis albiventris* | PCR | SC | Canoinhas | Universidade Federal do Paraná | -26.1778 | -50.3903 | Pontarolo et al. 2021 |
| **210** | *Trypanosoma cruzi* | *Caluromys philander* | Cul/PCR | MG | Serra da Canastra | Instituto Oswaldo Cruz | -20.349444 | -46.63833 | Rocha et al. 2013 |
| **211** | *Trypanosoma cruzi* | *Marmosops incanus* | Ser/Cul/PCR | MG | Serra da Canastra | Instituto Oswaldo Cruz | -20.349444 | -46.63833 | Rocha et al. 2013 |
| **212** | *Trypanosoma cruzi* | *Monodelphis* sp. | Ser/PCR | MG | Serra da Canastra | Instituto Oswaldo Cruz | -20.349444 | -46.63833 | Rocha et al. 2013 |
| **213** | *Trypanosoma cruzi* | *Gracilinanus agilis* | Ser/Cul/PCR | MS | Aquidauana | Instituto Oswaldo Cruz | -19.581667 | -56.25 | Herrera et al. 2011 |
| **214** | *Trypanosoma cruzi* | *Monodelphis domestica* | Ser/Cul/PCR | MS | Aquidauana | Instituto Oswaldo Cruz | -19.581667 | -56.25 | Herrera et al. 2011 |
| **215** | *Trypanosoma cruzi* | *Thylamys* sp. | Ser/PCR | MS | Aquidauana | Instituto Oswaldo Cruz | -19.581667 | -56.25 | Herrera et al. 2011 |
| **216** | *Trypanosoma cruzi* | *Philander frenatus* | Ser/Cul/PCR | MS | Aquidauana | Instituto Oswaldo Cruz | -19.581667 | -56.25 | Herrera et al. 2011 |
| **217** | *Mycoplasma* sp. | *Didelphis albiventris* | PCR | MS | Campo Grande | Universidade Estadual Paulista | -20.4435 | -54.6478 | Gonçalves et al. 2020 |
| **218** | *Leptospira* sp. | *Didelphis albiventris* | Ser/PCR | SP | Botucatu | Universidade Estadual Paulista | -22.88583 | -48.445 | Fornazari et al. 2018 |
| **219** | *Toxoplasma gondii* | *Didelphis albiventris* | Ser | SP | Botucatu | Universidade Estadual Paulista | -22.88583 | -48.445 | Fornazari et al. 2011 |
| **220** | *Leptospira* sp. | *Didelphis albiventris* | PCR | PB | Campina Grande | Universidade Federal de Campina Grande | -7.23072 | -​35.8817 | Fernandes et al. 2020 |
| **221** | *Ehrlichia* spp. | *Didelphis aurita* | PCR | RJ | Rio de Janeiro | Universidade Federal Rural do Rio de janeiro | -22.979318 | -43.45654 | Guimarães et al. 2018 |
| **222** | *Ehrlichia* sp. | *Gracilinanus agilis* | PCR | MS | Corumbá | Universidade Estadual Paulista | -19.0098 | -57.6547 | De Sousa et al. 2017 |
| **223** | *Ehrlichia* sp. | *Thylamys macrurus* | PCR | MS | Corumbá | Universidade Estadual Paulista | -19.0098 | -57.6547 | De Sousa et al. 2017 |
| **224** | *Ehrlichia* sp. | *Monodelphis domestica* | PCR | MS | Corumbá | Universidade Estadual Paulista | -19.0098 | -57.6547 | De Sousa et al. 2017 |
| **225** | *Anaplasma* sp. | *Gracilinanus agilis* | PCR | MS | Corumbá | Universidade Estadual Paulista | -19.0098 | -57.6547 | De Sousa et al. 2017 |
| **226** | *Anaplasma* sp. | *Thylamys macrurus* | PCR | MS | Corumbá | Universidade Estadual Paulista | -19.0098 | -57.6547 | De Sousa et al. 2017 |
| **227** | *Rickettsia rickettsii Ricketssia bellii* | *Didelphis albiventris* | Ser | MG | Uberlândia | Universidade Federal de Uberlândia | -18.9113 | -48.2622 | Coelho et al. 2016 |
| **228** | *Rickettsia parkeri Rickettsia rhipicephali Ricketssia bellii* | *Gracilinanus agilis* | Ser | MG | Uberlândia | Universidade Federal de Uberlândia | -18.9113 | -48.2622 | Coelho et al. 2016 |
| **229** | *Aspidodera raillieti* | *Metachirus myosuros* | Mic | BA | Igrapiúna | Instituto Oswaldo Cruz | -13.8253 | -39.1305 | Cirino et al. 2020 |
| **230** | *Cruzia tentaculata* | *Metachirus myosuros* | Mic | BA | Igrapiúna | Instituto Oswaldo Cruz | -13.8253 | -39.1305 | Cirino et al. 2020 |
| **231** | *Physaloptera mirandai* | *Metachirus myosuros* | Mic | BA | Igrapiúna | Instituto Oswaldo Cruz | -13.8253 | -39.1305 | Cirino et al. 2020 |
| **232** | *Didelphonema longispiculata* | *Metachirus myosuros* | Mic | BA | Igrapiúna | Instituto Oswaldo Cruz | -13.8253 | -39.1305 | Cirino et al. 2020 |
| **233** | *Viannaia conspicua* | *Metachirus myosuros* | Mic | BA | Igrapiúna | Instituto Oswaldo Cruz | -13.8253 | -39.1305 | Cirino et al. 2020 |
| **234** | *Viannaia pusilla* | *Metachirus myosuros* | Mic | BA | Igrapiúna | Instituto Oswaldo Cruz | -13.8253 | -39.1305 | Cirino et al. 2020 |
| **235** | *Rhopalias coronatus* | *Metachirus myosuros* | Mic | BA | Igrapiúna | Instituto Oswaldo Cruz | -13.8253 | -39.1305 | Cirino et al. 2020 |
| **236** | *Mathevotaenia bivittata* | *Metachirus myosuros* | Mic | BA | Igrapiúna | Instituto Oswaldo Cruz | -13.8253 | -39.1305 | Cirino et al. 2020 |
| **237** | *Oligacanthorhynchus microcephalus* | *Metachirus myosuros* | Mic | BA | Igrapiúna | Instituto Oswaldo Cruz | -13.8253 | -39.1305 | Cirino et al. 2020 |
| **238** | *Toxoplasma gondii* | Didelphis aurita | Ser | BA | Elisio Medrado | Universidade Estadual de Santa Cruz | -12.9331 | -39.5124 | Brito Junior et al. 2020 |
| **239** | *Toxoplasma gondii* | Didelphis aurita | Ser | BA | Igrapiúna | Universidade Estadual de Santa Cruz | -13.8253 | -39.1305 | Brito Junior et al. 2020 |
| **240** | *Toxoplasma gondii* | *Gracilinanus microtarsus* | Ser | BA | Ilhéus | Universidade Estadual de Santa Cruz | -14.7973 | -39.0355 | Brito Junior et al. 2020 |
| **241** | *Toxoplasma gondii* | *Gracilinanus agilis* | Ser | BA | Mascote | Universidade Estadual de Santa Cruz | -15.5721 | -39.2917 | Brito Junior et al. 2020 |
| **242** | *Toxoplasma gondii* | *Gracilinanus agilis* | Ser | BA | Belmonte | Universidade Estadual de Santa Cruz | -15.8596 | -38.8903 | Brito Junior et al. 2020 |
| **243** | *Toxoplasma gondii* | *Marmosa murina* | Ser | BA | Ilhéus | Universidade Estadual de Santa Cruz | -14.7973 | -39.0355 | Brito Junior et al. 2020 |
| **244** | *Toxoplasma gondii* | *Marmosa murina* | Ser | BA | Belmonte | Universidade Estadual de Santa Cruz | -15.8596 | -38.8903 | Brito Junior et al. 2020 |
| **245** | *Toxoplasma gondii* | *Marmosops incanus* | Ser | BA | Mascote | Universidade Estadual de Santa Cruz | -15.5721 | -39.2917 | Brito Junior et al. 2020 |
| **246** | *Toxoplasma gondii* | *Marmosops incanus* | Ser | BA | Igrapiúna | Universidade Estadual de Santa Cruz | -13.8253 | -39.1305 | Brito Junior et al. 2020 |
| **247** | *Toxoplasma gondii* | *Monodelphis americana* | Ser | BA | Igrapiúna | Universidade Estadual de Santa Cruz | -13.8253 | -39.1305 | Brito Junior et al. 2020 |
| **248** | *Eimeria philanderi* | *Didelphis aurita* | Mic | BA | Una | Universidade Estadual de Santa Cruz | -15.2696 | -39.0694 | Fehlberg et al. 2018 |
| **249** | *Eimeria gambai* | *Gracilinanus agilis* | Mic | BA | Belmonte | Universidade Estadual de Santa Cruz | -15.8596 | -38.8903 | Fehlberg et al. 2018 |
| **250** | *Eimeria philanderi* | *Monodelphis americana* | Mic | BA | Una | Universidade Estadual de Santa Cruz | -15.2696 | -39.0694 | Fehlberg et al. 2018 |
| **251** | *Eimeria philanderi* | *Monodelphis americana* | Mic | BA | Belmonte | Universidade Estadual de Santa Cruz | -15.8596 | -38.8903 | Fehlberg et al. 2018 |
| **252** | *Eimeria philanderi Eimeria gambai* | *Marmosa demerarae* | Mic | BA | Una | Universidade Estadual de Santa Cruz | -15.2696 | -39.0694 | Fehlberg et al. 2018 |
| **253** | *Eimeria philanderi Eimeria gambai* | *Marmosa murina* | Mic | BA | Una | Universidade Estadual de Santa Cruz | -15.2696 | -39.0694 | Fehlberg et al. 2018 |
| **254** | *Eimeria philanderi Eimeria gambai* | *Marmosa murina* | Mic | BA | Mascote | Universidade Estadual de Santa Cruz | -15.5721 | -39.2917 | Fehlberg et al. 2018 |
| **255** | *Eimeria philanderi* | *Marmosa murina* | Mic | BA | Belmonte | Universidade Estadual de Santa Cruz | -15.8596 | -38.8903 | Fehlberg et al. 2018 |
| **256** | *Rotavirus* | *Didelphis marsupialis* | Ser | PA | Serra dos Carajás | Instituto Evandro Chagas | -6.108056 | -50.304444 | Linhares et al. 1986 |
| **257** | *Hepatovirus* | *Didelphis marsupialis* | Ser | PA | Altamira | Instituto Evandro Chagas | -3.1946 | -52.2093 | Soares et al. 1987 |
| **258** | *Hepatovirus* | *Didelphis marsupialis* | Ser | PA | Oriximiná | Instituto Evandro Chagas | -1.75994 | -55.8625 | Soares et al. 1987 |
| **259** | *Hantavirus* | *Monodelphis ihering* | PCR | SP | Biritiba Mirin | Universidade de São Paulo | -23.574444 | -46.038333 | De Araujo et al. 2012 |
| **260** | *Hantavirus* | *Marmosa paraguayana* | PCR | SP | Biritiba Mirin | Universidade de São Paulo | -23.574444 | -46.038333 | De Araujo et al. 2012 |
| **261** | *Hantavirus* | *Didelphis aurita* | PCR | SP | Biritiba Mirin | Universidade de São Paulo | -23.574444 | -46.038333 | De Araujo et al. 2012 |
| **262** | *Hepatovirus* | *Didelphis aurita* | Ser/PCR | BA | Salvador | Universidade Federal da Bahia | -12.9704 | -38.5124 | Carneiro 2018 |
| **263** | *Trypanosoma cruzi* | *Didelphis sp.* | PCR | BA | Salvador | Universidade Federal da Bahia | -12.9704 | -38.5124 | Trueb et al. 2018 |
| **264** | *Leishmania* sp. | *Didelphis sp.* | PCR | BA | Salvador | Universidade Federal da Bahia | -12.9704 | -38.5124 | Trueb et al. 2018 |
| **265** | *Leishmania* sp. | *Marmosa (Micoureus) sp.* | PCR | BA | Salvador | Universidade Federal da Bahia | -12.9704 | -38.5124 | Trueb et al. 2018 |
| **266** | *Leishmania braziliensis* | *Didelphis albiventris* | PCR | AL | Viçosa | Universidade Federal Rural de Pernambuco | -9.36338 | -36.2386 | Silva et al. 2016 |
| **267** | *Leishmania* spp*.* | *Didelphis albiventris* | PCR | PB | São Vicente Ferrer | Instituto Aggeu Magalhães | -7.5906 | -​35.4916 | Lima et al. 2013 |
| **268** | *Leishmania* spp*.* | *Marmosa sp.* | PCR | PB | São Vicente Ferrer | Instituto Aggeu Magalhães | -7.5906 | -​35.4916 | Lima et al. 2013 |
| **269** | *Leishmania* spp*.* | *Monodelphis domestica* | PCR | PB | São Vicente Ferrer | Instituto Aggeu Magalhães | -7.5906 | -​35.4916 | Lima et al. 2013 |
| **270** | *Toxoplasma gondii* | *Didelphis albiventris* | Ser | SP | Jabuticabal | Universidade de São Paulo | -21.2554 | -48.3224 | Vitaliano et al. 2014 |
| **271** | *Trypanosoma cruzi* | *Philander opossum* | Cul/PCR | PA | São Domingos do Capim | Universidade Federal do Pará | -1.67595 | -47.7658 | Barros et al. 2020 |
| **272** | *Rickettsia rickettsii* | *Didelphis albiventris* | Ser | SP | Monte Mor | Agência Paulista de Tecnologia dos Agronegócios | -22.9472 | -47.3168 | Ueno et al. 2020 |
| **273** | *Rickettsia* spp. | *Didelphis albiventris* | Ser | SP | Pauliceia | Universidade de São Paulo | -21.3139 | -51.8329 | Silveira et al. 2015 |
| **274** | *Trypanosoma cruzi* | *Didelphis albiventris* | Ser/Cul | PI | Serra da Capivara | Instituto Oswaldo Cruz | -8.906389 | -42.764167 | Herrera et al. 2005 |
| **275** | *Trypanosoma cruzi* | *Monodelphis domestica* | Cul | PI | Serra da Capivara | Instituto Oswaldo Cruz | -8.906389 | -42.764167 | Herrera et al. 2005 |
| **276** | *Trypanosoma cruzi* | *Gracilinanus agilis* | Ser | PI | Serra da Capivara | Instituto Oswaldo Cruz | -8.906389 | -42.764167 | Herrera et al. 2005 |
| **277** | *Trypanosoma cruzi Trypanosoma evansi* | *Gracilinanus agilis* | Ser/Cul | MS | Fazenda Rio Negro | Instituto Oswaldo Cruz | -19.581667 | -56.25 | Herrera et al. 2007 |
| **278** | *Trypanosoma cruzi Trypanosoma evansi* | *Gracilinanus agilis* | Ser/Cul | MS | Fazenda Alegre | Instituto Oswaldo Cruz | -19.141111 | -56.82305 | Herrera et al. 2007 |
| **279** | *Trypanosoma cruzi Trypanosoma evansi* | *Monodelphis domestica* | Ser/Cul | MS | Fazenda Rio Negro | Instituto Oswaldo Cruz | -19.581667 | -56.25 | Herrera et al. 2007 |
| **280** | *Trypanosoma cruzi* | *Monodelphis domestica* | Ser/Cul | MS | Fazenda Alegre | Instituto Oswaldo Cruz | -19.141111 | -56.82305 | Herrera et al. 2007 |
| **281** | *Trypanosoma cruzi* | *Thylamys macrurus* | Ser | MS | Fazenda Alegre | Instituto Oswaldo Cruz | -19.141111 | -56.82305 | Herrera et al. 2007 |
| **282** | *Trypanosoma cruzi Trypanosoma evansi* | *Thylamys macrurus* | Ser | MS | Fazenda Rio Negro | Instituto Oswaldo Cruz | -19.581667 | -56.25 | Herrera et al. 2007 |
| **283** | *Trypanosoma cruzi Trypanosoma evansi* | *Philander frenatus* | Ser/Cul | MS | Fazenda Rio Negro | Instituto Oswaldo Cruz | -19.581667 | -56.25 | Herrera et al. 2007 |
